# Supplementary material for: Fast and reversible surface redox reduction in V2O5 dispersed on CNx nanotubes
Source: Royal Society of Chemistry journal article supplement (doi:10.1039/b809253b), 2008-01-01
Supplement: b809253b.pdf [file b809253b.pdf]

## Supplementary Information

### Fast and Reversible Surface Redox Reduction in $V_2O_5$ Dispersed on $CN_x$ Nanotubes

Wei Chuan Fang \*

*Materials and Chemical Research Laboratories, Industrial Technology Research Institute, Chutung 310, Taiwan*

5

10

15

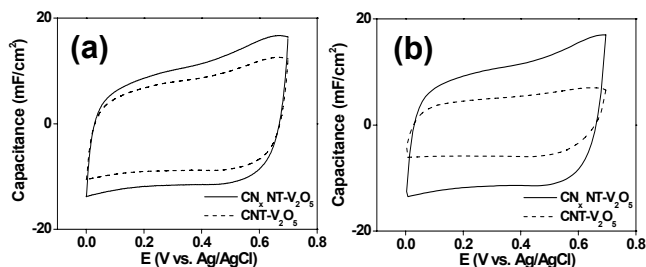

**Figure S1** CV curves of  $V_2O_5$  on N-doped and undoped CNTs performed (a) before and (b) after 1000-cycle tests. (Electrolyte: 1 20 M KCl and 1 M  $KHSO_4$ )
